# Supplementary material
Source: PubMed Central journal article supplement (PMC4105697)
Supplement: NIHMS598673-supplement-1.pdf [file NIHMS598673-supplement-1.pdf]

# Suppl. Fig. 1

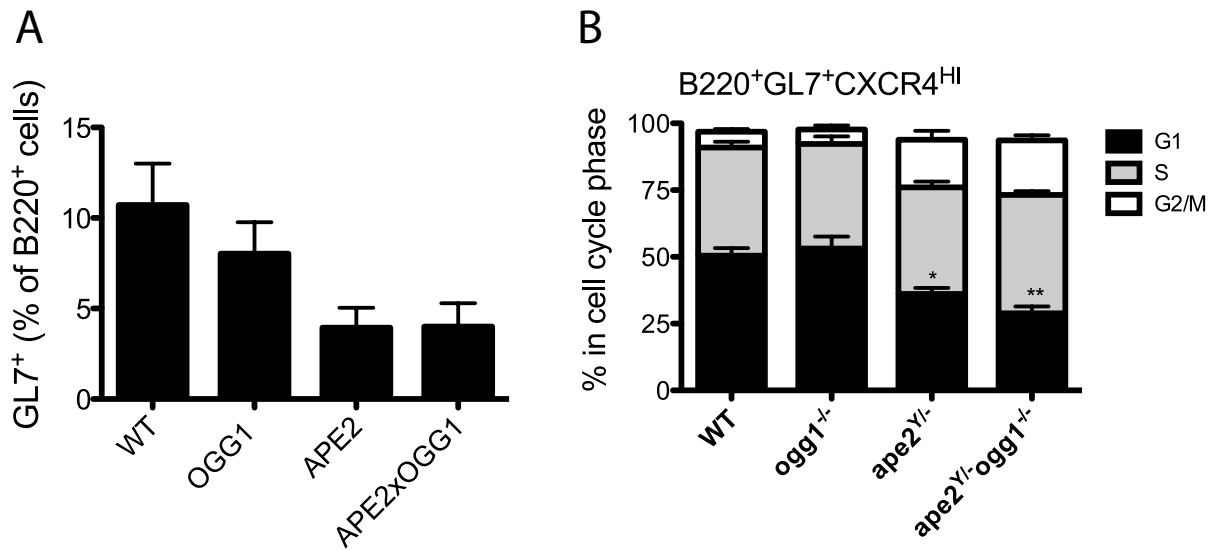

**Figure S1. Germinal center defect in APE2-deficient mice is not more severe on an Ogg1-deficient background.** (A) PP GL7<sup>+</sup> GC cells shown as a percent of B220<sup>+</sup> cells, as determined by flow cytometry. (B) Propidium iodide stain for DNA content of PP cells gated on B220<sup>+</sup>GL7<sup>+</sup>CXCR4<sup>HI</sup> cells shows fewer cells in G1 phase in APE2-deficient and APE2-OGG1- doubly-deficient GC cells (mean  $\pm$  SEM, n=4, \*p<0.05, \*\*p<0.01 vs. WT for G1 phase. Slight increase in the double knockout relative to APE2 single knockout was very consistent, but not statistically significant.
